# Supplementary material for: Extracting social determinants of health from electronic health records using natural language processing: a systematic review
Source: PubMed Central journal article supplement — J Am Med Inform Assoc. 2021 Oct 6;28(12):2716–27. doi: 10.1093/jamia/ocab170 (PMC8633615; doi:10.1093/jamia/ocab170), 2021-10-06
Supplement: ocab170_supplementary_data.pdf [file ocab170_supplementary_data.pdf]

## SUPPLEMENTARY MATERIAL

**Table S1:** List of SDoH keywords used for searching literature.

| <b>Keywords</b>                              | <b>Related Keywords</b>                                                          |
|----------------------------------------------|----------------------------------------------------------------------------------|
| <b>NLP</b>                                   |                                                                                  |
| natural language processing                  | NLP, text mining, information retrieval                                          |
| <b>EHR</b>                                   |                                                                                  |
| electronic health records                    | EHR, electronic medical record, EMR                                              |
| <b>General</b>                               |                                                                                  |
| behavioral determinants of health            | bdoh, bdh                                                                        |
| social determinants of health                | sdh, sdoh                                                                        |
| social and behavioral determinants of health | sbdh, sbdoh                                                                      |
| <b>Health behavior</b>                       |                                                                                  |
| smoking                                      | cigarette, cigarette use, tobacco, tobacco use, nicotine                         |
| alcohol use                                  | alcohol abuse, alcohol withdrawal, alcohol consume, alcoholism, alcohol disorder |
| drug use                                     | drug abuse                                                                       |
| diet                                         | nutrition                                                                        |
| exercise                                     | physical activity                                                                |
| sexual activity                              | sexual abuse                                                                     |
| child abuse                                  | childhood abuse, adverse childhood abuse, adverse childhood experience           |
| abuse                                        | -                                                                                |
| substance use                                | substance abuse                                                                  |
| <b>Access to care</b>                        |                                                                                  |
| health care                                  | quality care, access to care, access primary care, access health care            |
| <b>Social and economic factors</b>           |                                                                                  |
| education                                    | educational stress                                                               |
| income                                       | financial condition, financial constraints, economic condition                   |
| work                                         | occupation, working condition, employment, unemployment                          |
| community safety                             | community support                                                                |
| social support                               | social isolation, social connections, social cohesion                            |
| family support                               | -                                                                                |
| food security                                | food insecurity                                                                  |
| living supply                                | poverty                                                                          |
| <b>Physical environment</b>                  |                                                                                  |
| housing                                      | homeless, homelessness, living condition                                         |
| air quality                                  | water quality                                                                    |
| public safety                                | -                                                                                |
| transport                                    | transit, transportation                                                          |

**Table S2:** Example queries for each database

| <b>Database</b> | <b>Example</b>                                                                                                                                                                                                                                 | <b>No results SDoH terms</b>                                                                                                                                                                                                                                                                                                                   |
|-----------------|------------------------------------------------------------------------------------------------------------------------------------------------------------------------------------------------------------------------------------------------|------------------------------------------------------------------------------------------------------------------------------------------------------------------------------------------------------------------------------------------------------------------------------------------------------------------------------------------------|
| ACL Anthology   | <i>nlp + ehr + homelessness</i>                                                                                                                                                                                                                | ACL anthology provided search results for every query, however, many search results from ACL Anthology were irrelevant.                                                                                                                                                                                                                        |
| PubMed          | <i>(nlp OR (natural language processing) OR (text mining) OR ir OR (information retrieval) ) AND (ehr OR (electronic health records) OR emr OR (electronic medical records)) AND (housing OR homeless OR homelessness OR living condition)</i> | food security, living supply, food insecurity, poverty, financial constraints, adverse childhood abuse, and alcohol withdrawal                                                                                                                                                                                                                 |
| Scopus          | <i>Similar to PubMed</i>                                                                                                                                                                                                                       | food security, food insecurity, transit, transportation, air quality, water quality, sexual activity, child abuse, diet, exercise, bdh, bdoh, occupation, physical activity, social cohesion, living supply, poverty, financial constrains, living condition, financial condition, economic condition, alcohol withdrawal, and alcohol consume |

**Table S3:** Publications for different social determinants of health. PE:Physical Environment, SEF: Social and Economic Factors, HB: Health Behaviors, T:Transportation, H:Housing issues, EN: Environment (Water/Air quality), E: Employment, ED: Education, F: Financial/Income issues, SF: Social Connection/Isolation or Family Problem, CS: Community Safety, FI: Food Insecurity, CA: Child Abuse/adverse childhood experiences, SA: Sexual activity/abuse, DS: Drug/Substance Abuse, A: Alcohol Abuse/Use, C: Cigarettes/Smoking Status, DE: Diet & Exercise, CC: Clinical care (access to care /quality of care).

| Citations | PE |   |    | SEF |    |   |    |    |    | HB |    |    |   |   | CC | Other |                                       |
|-----------|----|---|----|-----|----|---|----|----|----|----|----|----|---|---|----|-------|---------------------------------------|
|           | T  | H | EN | E   | ED | F | SF | CS | FI | CA | SA | DS | A | C |    |       | DE                                    |
| [4]       |    |   |    |     |    |   |    |    |    |    |    | ✓  |   |   |    |       |                                       |
| [8]       |    |   |    |     |    |   |    |    |    |    | ✓  |    |   |   |    |       |                                       |
| [9]       |    | ✓ |    |     |    |   | ✓  |    |    |    |    |    |   |   |    |       |                                       |
| [10]      | ✓  | ✓ |    |     |    | ✓ | ✓  |    | ✓  |    |    |    | ✓ | ✓ |    |       | Information on clothing               |
| [11]      |    |   |    |     |    |   |    |    |    |    |    | ✓  |   |   |    |       |                                       |
| [12]      |    | ✓ |    |     |    |   |    |    |    | ✓  |    |    |   |   |    |       |                                       |
| [16]      |    | ✓ |    |     |    |   |    |    |    |    |    |    |   |   |    |       |                                       |
| [17]      |    |   |    |     |    |   |    |    |    |    |    |    | ✓ | ✓ | ✓  |       |                                       |
| [18]      |    | ✓ |    |     |    |   |    |    |    |    |    |    |   |   |    |       |                                       |
| [19]      |    | ✓ |    |     |    |   |    |    |    |    |    |    |   |   |    |       |                                       |
| [20]      |    | ✓ |    |     |    | ✓ | ✓  |    |    |    | ✓  | ✓  |   |   |    |       | Physical function, jail, nonadherence |

*Continued on next page*

Table S3 – Continued from previous page

| Citations | T | H | EN | E | ED | F | SF | CS | FI | CA | SA | DS | A | C | DE | CC | Other                                                   |
|-----------|---|---|----|---|----|---|----|----|----|----|----|----|---|---|----|----|---------------------------------------------------------|
| [21]      | ✓ | ✓ |    | ✓ |    | ✓ | ✓  |    |    |    | ✓  |    |   |   |    | ✓  | legal problems,<br>nonspecific<br>psychosocial<br>needs |
| [22]      |   | ✓ |    |   |    |   |    |    |    |    |    |    |   |   |    |    |                                                         |
| [23]      |   | ✓ |    |   |    | ✓ |    |    |    |    |    |    |   |   |    |    | Criminal Justice,<br>Health Behaviours                  |
| [24]      |   |   |    |   |    |   |    |    |    |    |    | ✓  | ✓ |   |    |    |                                                         |
| [25]      |   |   |    |   |    |   |    |    |    |    |    | ✓  |   |   |    |    |                                                         |
| [26]      |   |   |    |   |    |   |    |    |    |    |    | ✓  | ✓ |   |    |    | depression<br>and suicide                               |
| [27]      |   |   |    |   |    |   |    |    |    |    |    |    |   | ✓ |    |    |                                                         |
| [28]      |   | ✓ |    | ✓ | ✓  |   |    |    |    |    |    |    |   |   |    |    | Insurance status                                        |
| [29]      |   |   |    |   |    |   |    |    |    |    |    |    |   | ✓ |    |    | proximal femur<br>(hip) fracture                        |
| [30]      |   |   |    |   |    |   |    |    |    | ✓  |    |    |   |   |    |    |                                                         |
| [31]      |   |   |    |   |    |   |    |    |    | ✓  |    |    |   |   |    |    |                                                         |

Continued on next page

Table S3 – *Continued from previous page*

| Citations | T | H | EN | E | ED | F | SF | CS | FI | CA | SA | DS | A | C | DE | CC | Other                                             |
|-----------|---|---|----|---|----|---|----|----|----|----|----|----|---|---|----|----|---------------------------------------------------|
| [32]      |   | ✓ |    |   |    |   |    |    |    |    | ✓  | ✓  | ✓ |   |    |    | sexual orientation<br>and gender<br>documentation |
| [33]      |   | ✓ |    |   |    |   |    |    |    |    | ✓  | ✓  | ✓ |   |    |    | sexual orientation                                |
| [34]      |   |   |    |   |    |   |    |    |    |    |    | ✓  |   |   |    |    |                                                   |
| [35]      |   |   |    |   |    |   |    |    |    |    |    | ✓  | ✓ | ✓ |    |    |                                                   |
| [36]      |   |   |    |   |    |   |    |    |    |    |    |    |   |   | ✓  |    |                                                   |
| [37]      |   | ✓ |    |   |    |   |    |    |    |    |    |    |   |   |    |    | Social security<br>disability                     |
| [38]      |   |   |    |   |    |   |    |    |    |    |    | ✓  |   |   |    |    |                                                   |
| [39]      |   |   |    |   |    |   |    |    |    |    |    | ✓  |   |   |    |    |                                                   |
| [40]      |   | ✓ |    |   |    |   |    |    |    |    |    |    |   |   |    |    |                                                   |
| [41]      |   |   |    |   |    |   |    |    |    |    |    |    |   | ✓ |    |    |                                                   |
| [42]      |   | ✓ |    | ✓ |    |   |    |    |    |    |    | ✓  | ✓ | ✓ |    |    |                                                   |
| [43]      |   |   |    |   |    |   |    |    |    |    |    | ✓  |   |   |    |    |                                                   |
| [44]      |   |   |    |   |    |   |    |    |    |    |    | ✓  |   |   |    |    |                                                   |
| [45]      |   |   |    |   |    |   |    |    |    |    |    | ✓  |   |   |    |    |                                                   |
| [46]      |   |   |    |   |    |   |    |    |    |    |    |    |   |   | ✓  |    |                                                   |

*Continued on next page*

Table S3 – Continued from previous page

| Citations | T | H | EN | E | ED | F | SF | CS | FI | CA | SA | DS | A | C | DE | CC | Other                                                                                |
|-----------|---|---|----|---|----|---|----|----|----|----|----|----|---|---|----|----|--------------------------------------------------------------------------------------|
| [47]      |   | ✓ |    | ✓ | ✓  | ✓ | ✓  |    | ✓  |    |    |    |   |   |    |    | insurance                                                                            |
| [48]      |   | ✓ |    | ✓ |    |   |    |    |    |    |    |    | ✓ | ✓ | ✓  |    | Social history<br>(Seatbelt, Language,<br>Abuse, Helmets),<br>family, marital status |
| [49]      |   |   |    |   |    |   |    |    |    |    |    | ✓  |   |   |    |    |                                                                                      |
| [50]      |   |   |    |   |    |   | ✓  |    |    |    |    |    |   |   | ✓  |    | 72 other categories                                                                  |
| [51]      |   | ✓ |    |   |    |   |    |    |    |    |    |    | ✓ | ✓ |    |    | Living alone, use of<br>substance use services                                       |
| [52]      |   |   |    |   |    |   |    |    |    | ✓  |    |    |   |   |    |    |                                                                                      |
| [53]      |   |   |    |   |    |   |    |    |    |    | ✓  |    |   |   |    |    |                                                                                      |
| [54]      |   |   |    |   |    |   |    |    |    |    | ✓  |    |   |   |    |    |                                                                                      |
| [55]      |   |   |    |   |    |   |    |    |    |    |    | ✓  |   |   |    |    |                                                                                      |
| [56]      |   |   |    |   |    |   | ✓  |    |    |    |    |    |   |   |    |    |                                                                                      |
| [57]      |   |   |    |   |    |   |    |    |    |    |    |    |   | ✓ |    |    | Other information<br>not related to SDoH                                             |
| [58]      |   |   |    |   |    |   |    |    |    |    |    |    |   | ✓ |    |    |                                                                                      |
| [59]      |   | ✓ |    |   |    |   | ✓  |    |    |    |    | ✓  |   |   |    |    |                                                                                      |

Continued on next page

Table S3 – Continued from previous page

| Citations | T | H | EN | E | ED | F | SF | CS | FI | CA | SA | DS | A | C | DE | CC | Other                                       |
|-----------|---|---|----|---|----|---|----|----|----|----|----|----|---|---|----|----|---------------------------------------------|
| [60]      |   |   |    |   |    |   |    |    |    |    |    |    |   | ✓ |    |    |                                             |
| [61]      |   |   |    |   |    |   |    |    |    |    |    |    |   | ✓ |    |    |                                             |
| [62]      |   |   |    |   |    |   |    | ✓  |    |    |    |    |   |   |    |    |                                             |
| [63]      |   |   | ✓  |   |    |   |    |    |    |    |    |    |   |   | ✓  |    |                                             |
| [64]      |   |   |    |   |    |   |    |    |    |    |    |    |   | ✓ | ✓  |    |                                             |
| [65]      |   |   |    |   |    |   |    |    |    |    |    |    |   |   | ✓  |    |                                             |
| [66]      |   | ✓ |    |   |    |   |    |    |    |    |    |    |   |   |    |    |                                             |
| [67]      |   |   |    | ✓ | ✓  |   |    |    |    |    |    |    |   |   |    |    | Vocational Interests<br>and Driving Ability |
| [68]      |   |   |    |   |    |   |    |    |    |    |    |    |   | ✓ |    |    |                                             |
| [69]      |   |   |    |   |    |   |    |    |    | ✓  |    |    |   |   |    |    |                                             |
| [70]      |   |   |    |   |    |   |    |    |    |    | ✓  |    |   |   |    |    |                                             |
| [71]      |   |   |    |   |    |   |    |    |    |    |    |    |   | ✓ |    |    |                                             |
| [72]      |   |   |    |   |    |   |    |    |    |    |    |    |   | ✓ |    |    |                                             |
| [73]      |   |   |    |   |    |   |    |    |    |    |    | ✓  |   |   |    |    |                                             |
| [74]      |   |   |    |   |    |   |    |    |    |    |    |    |   | ✓ |    |    |                                             |
| [75]      |   |   |    |   |    |   |    |    |    |    |    |    |   | ✓ |    |    |                                             |
| [76]      |   |   |    |   |    |   |    |    |    |    |    |    |   | ✓ |    |    |                                             |

Continued on next page

Table S3 – *Continued from previous page*

| Citations | T | H | EN | E | ED | F | SF | CS | FI | CA | SA | DS | A | C | DE | CC | Other                                                                                                                                                     |
|-----------|---|---|----|---|----|---|----|----|----|----|----|----|---|---|----|----|-----------------------------------------------------------------------------------------------------------------------------------------------------------|
| [77]      |   |   |    |   |    |   |    |    |    |    |    |    |   | ✓ |    |    |                                                                                                                                                           |
| [78]      |   |   |    |   |    |   |    |    |    |    |    |    | ✓ |   |    |    |                                                                                                                                                           |
| [79]      |   |   |    |   |    |   |    |    |    |    |    |    |   | ✓ |    |    |                                                                                                                                                           |
| [80]      |   |   |    |   |    |   |    |    |    |    |    |    |   |   |    |    | Quality of clinical care                                                                                                                                  |
| [81]      |   |   |    |   |    | ✓ |    |    |    |    |    |    |   |   |    |    |                                                                                                                                                           |
| [82]      |   |   |    |   |    |   |    |    |    |    |    |    | ✓ | ✓ |    |    |                                                                                                                                                           |
| [83]      |   |   |    |   |    |   |    |    |    |    |    |    |   |   |    |    | Marital status                                                                                                                                            |
| [84]      |   |   |    |   |    | ✓ |    |    |    |    |    |    |   |   |    |    |                                                                                                                                                           |
| [85]      |   |   |    |   |    |   |    |    |    |    |    |    |   |   | ✓  |    |                                                                                                                                                           |
| [87]      |   |   |    |   |    |   | ✓  |    |    |    |    |    |   |   | ✓  |    | falls, walking difficulty,<br>dementia, vision impairment,<br>absence of fecal control,<br>severe lack of urinary control,<br>weight loss, pressure ulcer |
| [88]      |   |   |    |   |    |   |    |    |    |    |    |    |   | ✓ | ✓  |    | BMI, socioeconomic status                                                                                                                                 |



**Table S4:** SDoH category wise citations for rule-based and semi-automated methods for SDoH lexicon creation

| SDoH Categories  | Citations                            |                |
|------------------|--------------------------------------|----------------|
|                  | Manual                               | Semi-automatic |
| Transportation   | [10, 21]                             |                |
| Housing issues   | [10, 16, 20, 21, 28, 42, 47, 48, 59] | [9, 12, 23]    |
| Environment      | [63]                                 |                |
| Employment       | [21, 28, 42, 47, 67]                 |                |
| Education        | [28, 47, 67]                         |                |
| Financial issues | [10, 20, 21, 47]                     | [23]           |
| Social issues    | [10, 20, 21, 39, 47, 56, 59]         | [9]            |
| Community safety | [62]                                 |                |
| Food insecurity  | [10, 47]                             |                |
| Child abuse      | [31, 69]                             | [12]           |
| Sexual abuse     | [20, 21]                             |                |
| Drug abuse       | [20, 42, 59]                         |                |
| Alcohol abuse    | [10, 17, 42, 48]                     |                |
| Smoking status   | [10, 17, 42, 48]                     |                |
| Diet             | [17, 42, 48, 63, 65, 85, 87]         |                |
| Clinical care    | [21, 28, 42, 47, 80]                 |                |

**Table S5:** SDoH category wise citations for rule-based, supervised, unsupervised, and NLP tool based methods for SDoH identification

| SDoH Categories  | Citations        |                  |              |             |
|------------------|------------------|------------------|--------------|-------------|
|                  | Rule-based       | Supervised       | Unsupervised | Tool based  |
| Transportation   | [10, 21]         |                  |              |             |
| Housing issues   | [10, 12, 21, 28] | [32, 33, 42, 47] | [48]         | [9, 16]     |
| Environment      |                  |                  |              | [63]        |
| Employment       | [21, 28]         | [42, 47]         | [48]         | [67]        |
| Education        | [28]             | [47]             |              | [67]        |
| Financial issues | [10, 21]         | [47, 81, 84]     |              |             |
| Social issues    | [10, 21, 39, 87] |                  | [50]         | [9, 56, 59] |
| Community safety |                  |                  |              | [62]        |
| Food insecurity  | [10]             | [47]             |              |             |
| Child abuse      | [12, 31, 69]     | [31, 52]         |              | [52]        |
| Sexual abuse     | [21]             | [32, 33]         |              |             |
| Drug abuse       |                  | [32, 33, 42]     |              | [59]        |
| Alcohol abuse    | [17]             | [32, 33, 42]     | [48]         |             |
| Smoking status   | [17]             | [42]             | [48]         | [64]        |
| Diet             | [17, 65, 85, 87] | [42]             | [48, 50]     | [63, 64]    |
| Clinical care    | [21, 28]         | [42, 47]         |              | [80]        |

**Table S6:** Classifiers used for SDoH extraction with the corresponding citations.

| <b>Classifiers</b>                            | <b>Citations</b>                                         |
|-----------------------------------------------|----------------------------------------------------------|
| SVM                                           | [29, 30, 32, 33, 35, 36, 43, 46, 47, 57, 71, 75, 76, 78] |
| Random forest                                 | [24, 30, 31, 33, 34, 40, 47, 75, 81, 82, 84, 88]         |
| Decision trees                                | [75]                                                     |
| Logistic Regression                           | [31, 33, 40, 41, 45, 75, 78]                             |
| LASSO regularization                          | [41]                                                     |
| Naïve Bayes (NB)                              | [30, 46]                                                 |
| K-nearest neighbors                           | [47, 75]                                                 |
| caRT                                          | [33]                                                     |
| Adaboost                                      | [33]                                                     |
| SGD classifier                                | [78]                                                     |
| Passive Aggressive Classifier                 | [78]                                                     |
| XGBoost                                       | [47]                                                     |
| Gradient boost classifier                     | [88]                                                     |
| n-gram based classifier                       | [45]                                                     |
| Latent Class Analysis (LCA)                   | [29, 49]                                                 |
| Topic modeling                                | [48]                                                     |
| LDA                                           | [50]                                                     |
| BiLSTM-CRF                                    | [42]                                                     |
| BiLSTM                                        | [42, 47]                                                 |
| Convolutional Neural Networks (CNN)           | [45, 46]                                                 |
| Gradient descent                              | [75]                                                     |
| Long short-term memory (LSTM)                 | [46]                                                     |
| Multilayer Perceptron Neural Networks (MLPNN) | [29]                                                     |
| Recurrent neural network (RNN)                | [46]                                                     |
